# Supplementary material for: Erb-B2 Receptor Tyrosine Kinase 2 is negatively regulated by the p53-responsive microRNA-3184-5p in cervical cancer cells
Source: PubMed Central journal article supplement — Oncol Rep. 2020 Nov 19;45(1):95–106. doi: 10.3892/or.2020.7862 (PMC7709819; doi:10.3892/or.2020.7862), 2020-11-19
Supplement: Supplementary_Data.pdf [file Supplementary_Data.pdf]

Figure S1. ERBB2 expression is upregulated in cervical cancer cell lines. (A) RT-qPCR analysis of ERBB2 mRNA expression and (B) WB analysis of ERBB2 protein expression in SiHa and HeLa cervical cancer cell lines compared with in the negative control, non-cancerous human H8 cervical epithelial cell line. GAPDH was used as the RT-qPCR housekeeping control and WB loading control. Data are expressed as the mean  $\pm$  SEM (n=3). \*\*P<0.01 vs. H8; ††P<0.01 vs. SiHa analyzed via one-way ANOVA. WB, western blotting; RT-qPCR, reverse transcription-quantitative PCR; ERBB2, Erb-B2 Receptor Tyrosine Kinase 2.

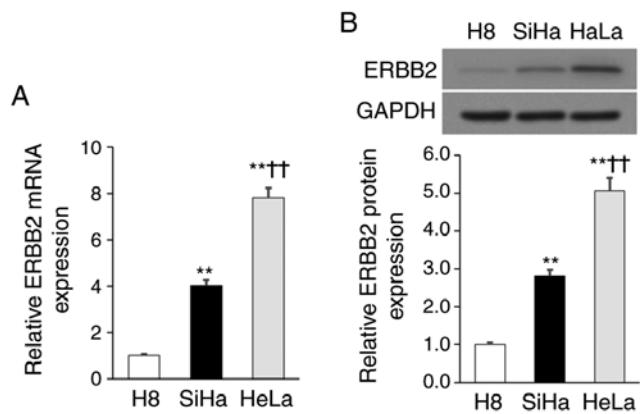

Figure S2. Validation of PIK3CA modulation in cervical cancer cell lines. Western blotting validation of (A) PIK3CA upregulation using a PIK3CA overexpression vector in HeLa cells and (B) PIK3CA knockdown using a PIK3CA-targeting siRNA in SiHa cells. GAPDH was used as the loading control. vec, vector; si, small interfering; PIK3CA, phosphatidylinositol-4,5-bisphosphate 3-kinase catalytic subunit  $\alpha$ .

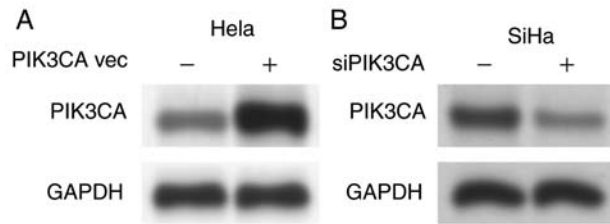

Figure S3. Validation of miR-3184 modulation in cervical cancer cell lines. Reverse transcription-quantitative PCR validation of (A) miR-3184-5p upregulation using a miR-3184-5p mimic in HeLa cells and (B) miR-3184-5p downregulation using a miR-3184-5p inhibitor in SiHa cells. U6 was used as the housekeeping control. Data are expressed as the mean  $\pm$  SEM (n=3). \*\*P<0.01 analyzed via Student's t-test. Ctrl, control; miR, microRNA; inhib, inhibitor.

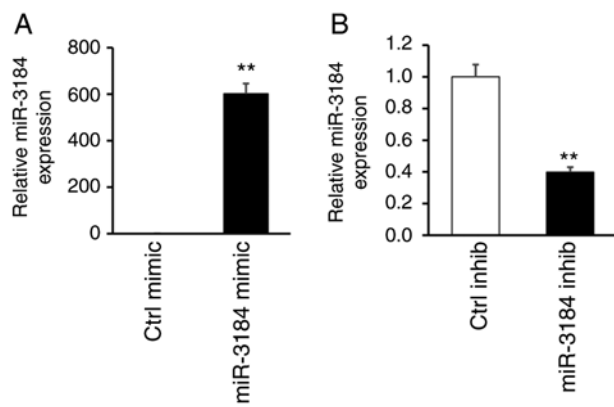

Figure S4. Low miR-3184-5p expression in patient-derived cervical cancer tissues is associated with a poor prognosis. miR-3184 expression values are reported relative to those of the housekeeping control U6. (A) miR-3184-5p expression in patient-derived cervical cancer vs. matched healthy cervical tissues. Data were analyzed via Wilcoxon signed-rank test. miR-3184-5p expression in (B) stage I/II vs. III/IV patient-derived cervical cancer biopsies and (C) lymph node metastatic vs. non-metastatic patient-derived cervical cancer biopsies. Data were analyzed via Mann-Whitney U test. (D) Survival analysis using the Kaplan-Meier method according to high (above the median) or low (below the median) miR-3184-5p expression. P-value was calculated using the log-rank test. Data in box plots are expressed as the median  $\pm$  IQRs (boxes) and absolute ranges (whiskers). \*\*P<0.01. miR, microRNA.

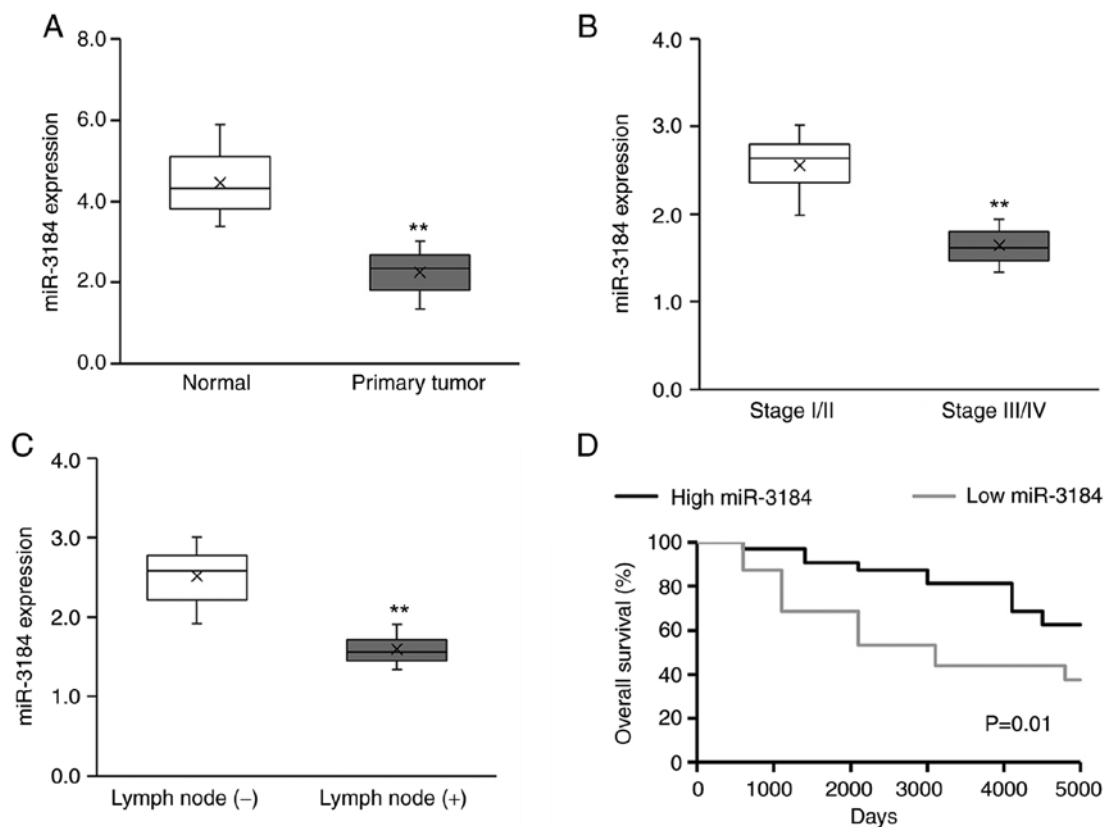

Table SI. Clinicopathological characteristics of recruited patients with cervical cancer (n=65).

| Characteristic               | No. | %  |
|------------------------------|-----|----|
| Age, years                   |     |    |
| ≤50                          | 29  | 45 |
| >50                          | 36  | 55 |
| Tumor size, cm               |     |    |
| ≤4                           | 45  | 69 |
| >4                           | 20  | 31 |
| Histological type            |     |    |
| Squamous cell carcinoma      | 48  | 74 |
| Adenocarcinoma               | 17  | 26 |
| FIGO stage                   |     |    |
| Stage I/II                   | 43  | 66 |
| Stage III/IV                 | 22  | 34 |
| Histological differentiation |     |    |
| Well + moderate              | 50  | 77 |
| Poor                         | 15  | 23 |
| Lymph node metastasis        |     |    |
| No                           | 46  | 71 |
| Yes                          | 19  | 29 |

FIGO, International Federation of Gynecologists and Obstetricians.
